# Supplementary material for: Imine-linked donor–acceptor metal–organic frameworks for an efficient photocatalytic oxidative coupling reaction
Source: Royal Society of Chemistry journal article supplement (doi:10.1039/d3qi02118a), 2023-11-15
Supplement: d3qi02118a1.pdf [file d3qi02118a1.pdf]

*Electronic Supplementary Information (ESI)*

**Imine-linked donor-acceptor metal-organic frameworks for an efficient photocatalytic oxidative coupling reaction**

Ri-Qin Xia, Tian-E Zhang, Zhen-Na Liu, Rong-Jia Wei\*, Guo-Hong Ning\*, Dan Li

College of Chemistry and Materials Science, Guangdong Provincial Key Laboratory of Functional Supramolecular Coordination Materials and Applications, Jinan University, Guangzhou 510632, People's Republic of China.

E-mail: [rjwei@jnu.edu.cn](mailto:rjwei@jnu.edu.cn), [guohongning@jnu.edu.cn](mailto:guohongning@jnu.edu.cn).

## **Contents**

- 1. General procedure**
- 2. Experimental section**
- 3. Fourier-transform infrared (FT-IR) spectra**
- 4. Solid-state  $^{13}\text{C}$  CP/MAS NMR spectra**
- 5. Energy Dispersive X-ray Spectroscopy (EDS)**
- 6. X-ray photoelectron spectroscopy (XPS)**
- 7. Thermogravimetric analysis (TGA)**
- 8. Variable-Temperature PXRD**
- 9. Stability in various solvents**
- 10. Structural Simulation**
- 11. Photos for obtained samples**
- 12. Photocurrent response**
- 13. Mott-Schottky plot**
- 14. EPR experiment**
- 15. Evaluation of the  $\text{O}_2\cdot^-$  generation efficiency**
- 16. Photocatalytic Application**
- 17. Computational Details**
- 18. Reference**

## 1. General procedure

Powder X-ray diffraction (PXRD) data was collected at 40 kV, 30 mA using microcrystalline samples on a Rigaku Ultima IV diffractometer using Cu-K $\alpha$  radiation ( $\lambda = 1.5418 \text{ \AA}$ ). The measurement parameters include a scan speed of 0.5  $^{\circ}$ /min, a step size of 0.02 $^{\circ}$ , and a scan range of  $2\theta$  from 1.5 $^{\circ}$  to 30 $^{\circ}$ . For temperature-dependent PXRD, the measurement parameters include a scan speed of 2  $^{\circ}$ C/min, a step size of 0.02 $^{\circ}$ , and a scan range of  $2\theta$  from 1.5 $^{\circ}$  to 30 $^{\circ}$ . Thermogravimetric analysis was performed on a Mettler-Toledo (TGA/DSC1) thermal analyzer. Measurement was made on approximately 5 mg of dried samples under a N<sub>2</sub> flow with a heating rate of 10  $^{\circ}$ C / min. The scanning electron microscopy (SEM) were obtained on Gemini300 Thermal Field Emission Scanning Electron Microscopy and Energy Dispersive X-ray Spectroscopy (EDS) images were obtained on a Helios Nanolab G3 CX microscope. Transmission electron microscopy (TEM) analysis was performed on FEI Talos F200X. Fourier transform infrared (FT-IR) spectrum was measured using a Nicolet Avatar 360 FT-IR spectrophotometer. X-ray photoelectron spectroscopy (XPS) experiments were performed by a Thermo ESCALAB 250XI system. GC-MS analysis was carried out on an Agilent 7890B GC analyzer. Liquid <sup>1</sup>H and <sup>13</sup>C NMR spectra were recorded on a Bruker Biospin Avance (400 MHz) equipment using tetramethylsilane (TMS) as an internal standard. Solid-state NMR experiments were performed on a Bruker WB Avance II 400 MHz NMR spectrometer. The <sup>13</sup>C CP/MAS NMR spectra were recorded with a 4-mm double-resonance MAS probe and with a sample spinning rate of 10.0 kHz; a contact time of 2 ms (ramp 100) and a pulse delay of 3 s was applied. Gas sorption analyses were conducted using an ASAP 2020 PLUS Analyzer (Micromeritics) with extra-high pure gases. Surface areas were calculated from the adsorption data using Brunauer-Emmett-Teller (BET) methods. The pore size distribution curves were obtained from the adsorption branches using density functional theory (DFT) method. Inductive Coupled Plasma (ICP) was measured by PerkinElmer OPTIMA 2000 ICP optical emission spectrometer.

## 2. Experimental section

All reagents were purchased from commercial suppliers and were used without further purification. 5''-(4'-Amino-[1,1'-biphenyl]-4-yl)-[1,1':4'',1''':3'',1''':4''',1''''-quinquephenyl]-4,4''''-diamine (**1**) and 3'',4'',5'',6''-Tetrakis(4'-amino[1,1'-biphenyl]-4-yl)-[1,1':4'',1''':2'',1''':4''',1''''-Quinquephenyl]-4,4''''-diamine (**2**) were purchased from Jilin Chinese Academy of Science-Yanshen Technology Co., Ltd.  $\text{Cu}_3\text{L}_3$  was prepared according to the literature method.<sup>2</sup>

### 2.1 Preparation of JNM-18

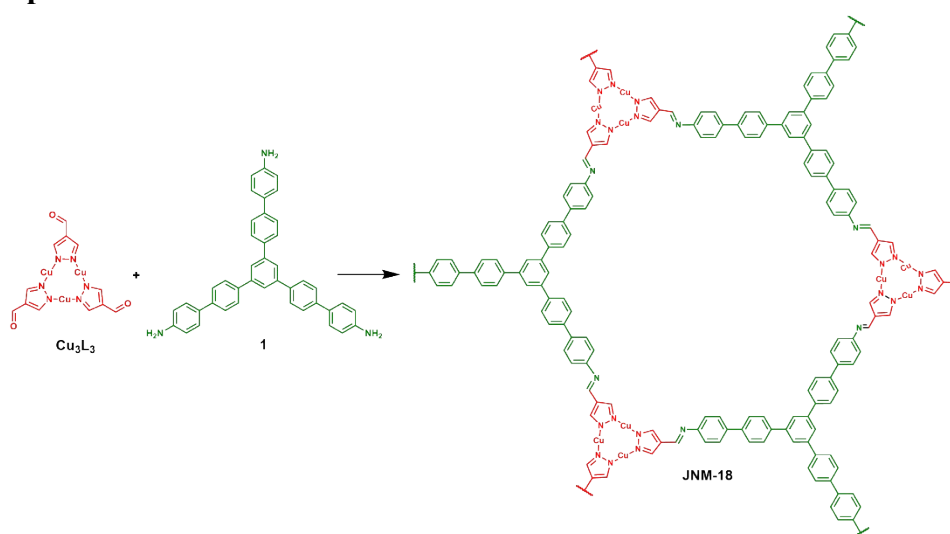

**Fig. S1** Synthesis of JNM-18.

A 10 mL Schlenk tube was charged with  $\text{Cu}_3\text{L}_3$  (19.0 mg, 0.04 mmol), **1** (23.6 mg, 0.04 mmol), 1.0 mL of mesitylene, 1.0 mL of 1,4-dioxane and 0.2 mL of 6 M aqueous Acetic Acid (AcOH). The mixture was flash-frozen at 77 K in a liquid nitrogen bath and degassed with three freeze-pump-thaw cycles. Upon warming to room temperature, the mixture was heated at 120 °C for 72 h. Yellow powders were isolated by filtration, washed and solvent exchanged with DMF and EtOH. The resultants were dried under vacuum at 100 °C for 8 h. Yield: 37.8 mg (88.7%, based on Cu). Elemental analysis calcd for  $\text{C}_{54}\text{H}_{36}\text{Cu}_3\text{N}_9$  (%): C 64.76, H 3.62, N 12.59; Found: C 61.71, H 3.70, N 9.05.

### 2.2 Preparation of JNM-19

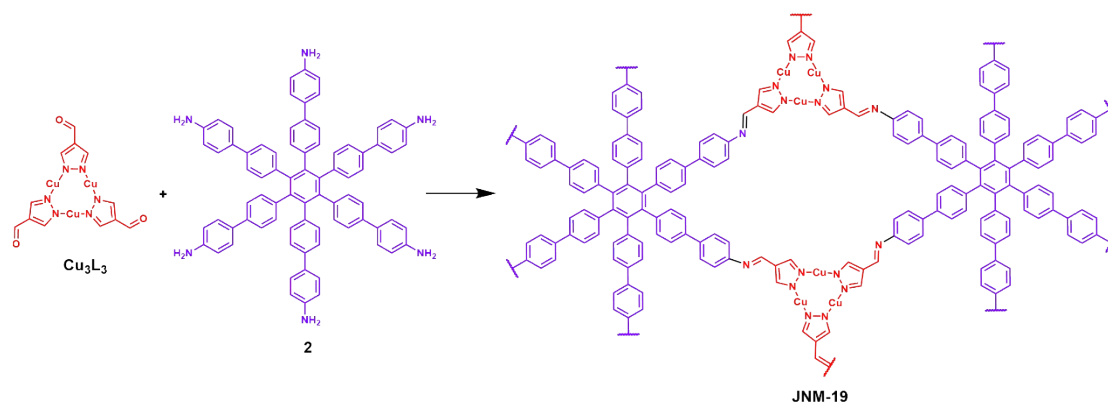

**Fig. S2** Synthesis of **JNM-19**.

A 10 mL Schlenk tube was charged with  $\text{Cu}_3\text{L}_3$  (19.0 mg, 0.04 mmol), **2** (22.0 mg, 0.02 mmol), 1.0 mL of 1,2-dichlorobenzene, 1.0 mL of 1-Butanol and 0.2 mL of 6 M aqueous Trifluoroacetate ( $\text{CF}_3\text{COOH}$ ). The mixture was flash-frozen at 77 K in a liquid nitrogen bath and degassed with three freeze-pump-thaw cycles. Upon warming to room temperature, the mixture was heated at 120 °C for 72 h. The brown-green powders were isolated by filtration, washed and solvent exchanged with EtOH and DMF. The resultants were dried under vacuum at 100 °C for 8 h. Yield: 37.0 mg (90.2%, based on Cu). Elemental analysis calcd for  $\text{C}_{102}\text{H}_{66}\text{Cu}_6\text{N}_{18}$  (%): C 63.64, H 3.46, N 13.10; Found: C 59.79, H 4.05, N 9.20.

### 2.3 Optimization of synthesis of **JNM-18** and **JNM-19**

The selection of reaction solvent was found to be significant to the crystallinities of the products. Controlled experiments revealed the sample obtained in a 5: 5: 1 (v/v) reaction mixture of mesitylene, 1,4-dioxane, and 6 M aqueous acetic acid (AcOH) showed the best crystallinity for **JNM-18** (Fig. S3), while the optimized reaction solvent for **JNM-19** was the 5: 5: 1 (v/v) mixture of 1,2-dichlorobenzene, 1-butanol and 6 M aqueous trifluoroacetate (TFA) (Fig. S4).

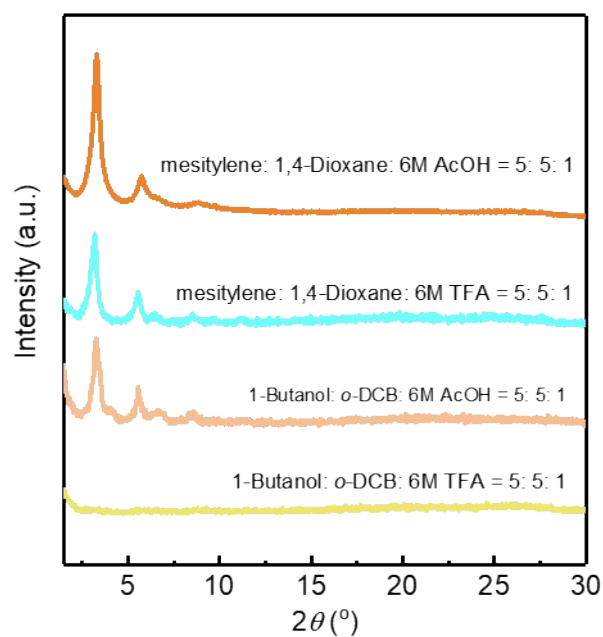

**Fig. S3** Comparison of **JNM-18** synthesized in different solvents.

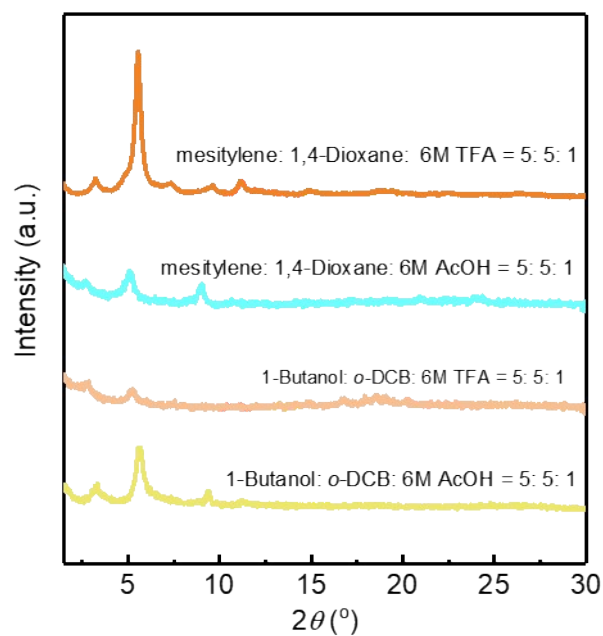

**Fig. S4** Comparison of **JNM-19** synthesized in different solvents.

### 3. Fourier-transform infrared (FT-IR) spectra

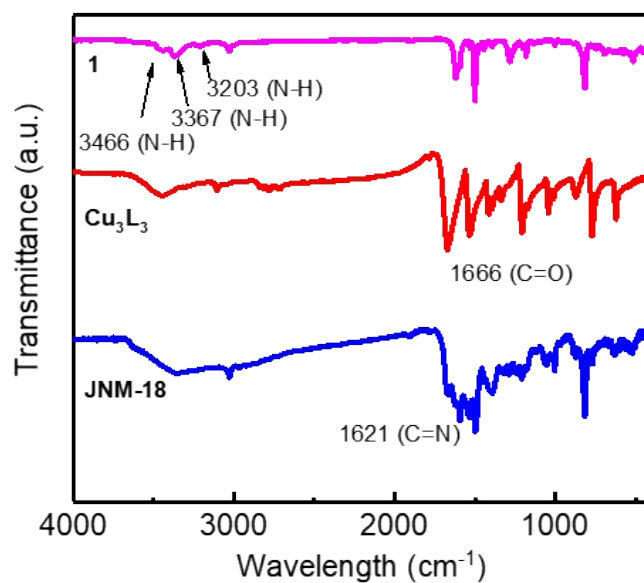

Fig. S5 FT-IR spectra of 1,  $\text{Cu}_3\text{L}_3$ , JNM-18.

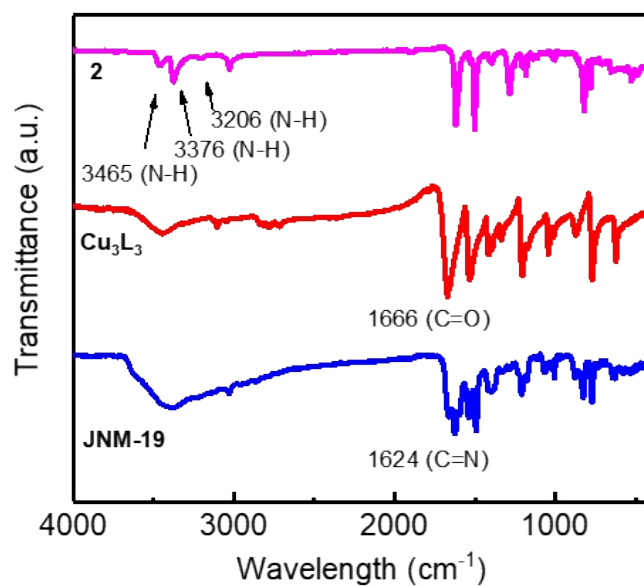

Fig. S6 FT-IR spectra of 2,  $\text{Cu}_3\text{L}_3$ , JNM-19.

#### 4. Solid-state $^{13}\text{C}$ CP/MAS NMR spectra

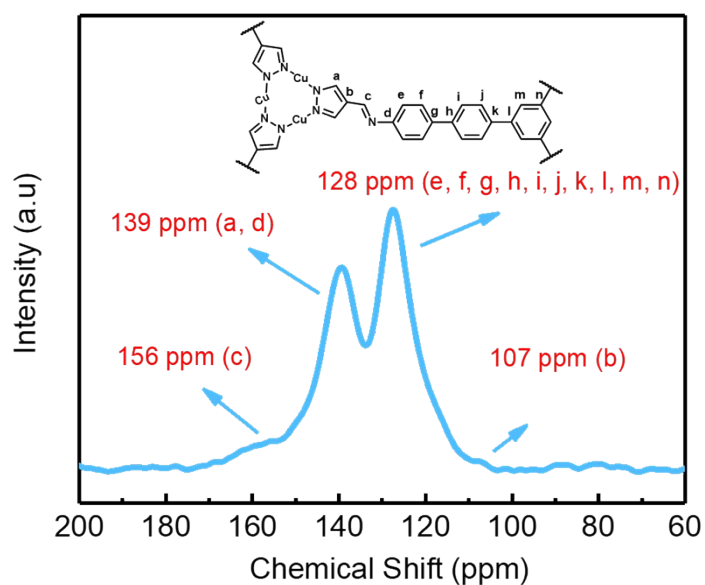

**Fig. S7** Solid-state  $^{13}\text{C}$  CP/MAS NMR spectra and peak assignments of **JNM-18**.

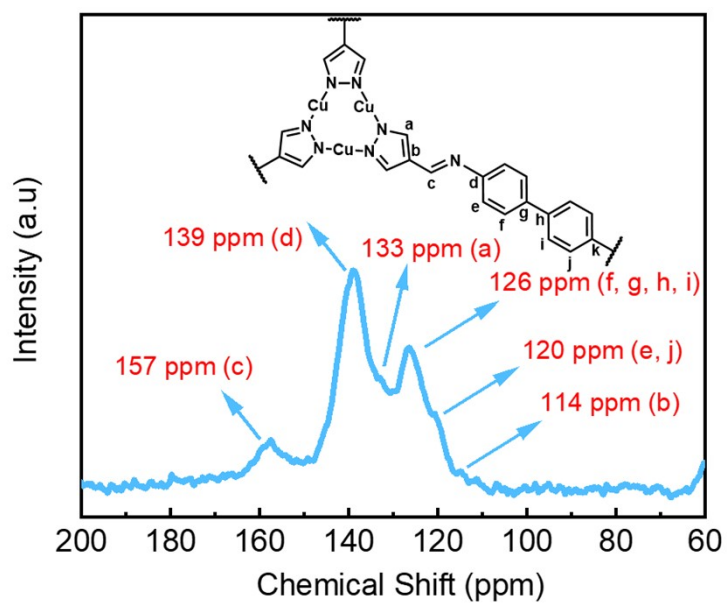

**Fig. S8** Solid-state  $^{13}\text{C}$  CP/MAS NMR spectra and peak assignments of **JNM-19**.



## 5. Energy Dispersive X-ray Spectroscopy (EDS)

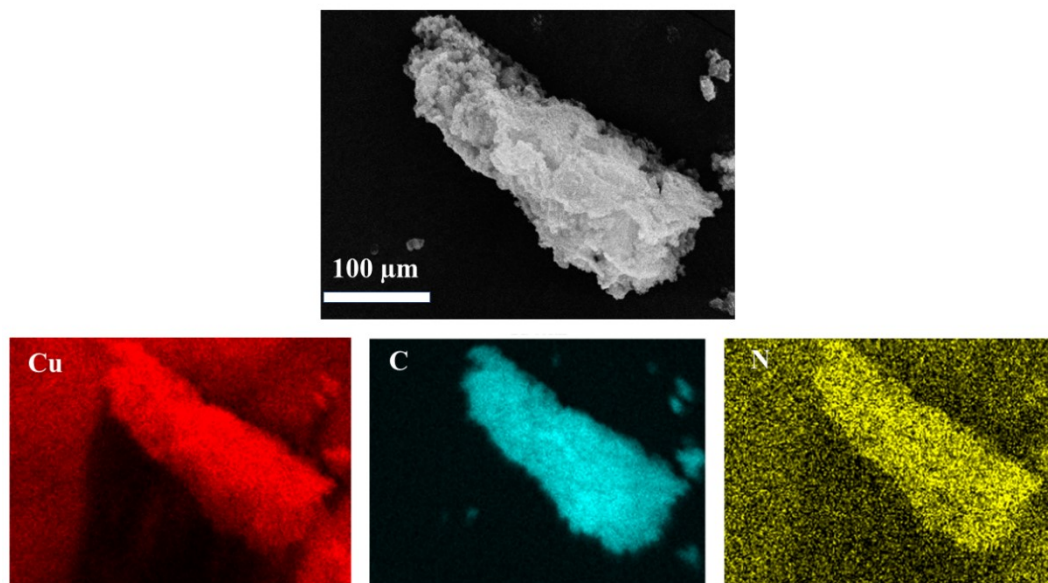

**Fig. S9** EDS of JNM-18 showing the uniform distribution of element C, N and Cu.

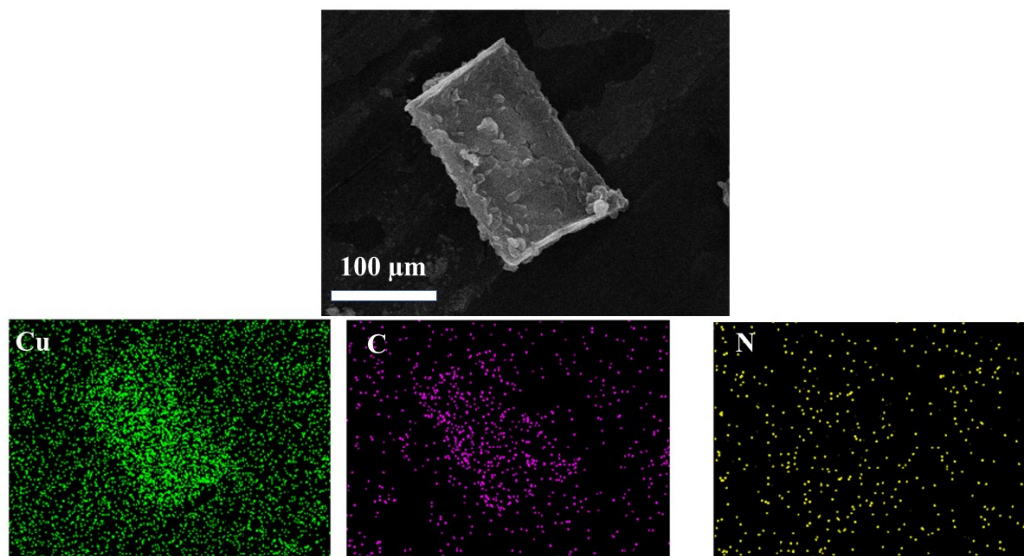

**Fig. S10** EDS of JNM-18 showing the uniform distribution of element C, N and Cu.

## 6. X-ray photoelectron spectroscopy (XPS)

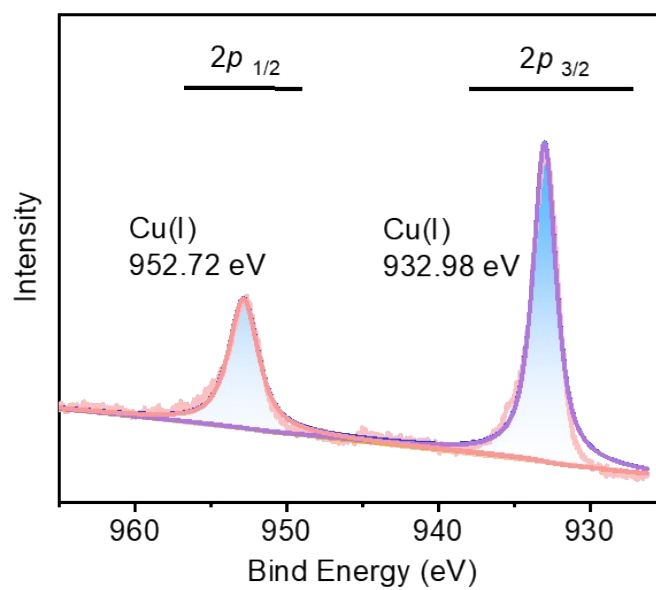

**Fig. S11** XPS of JNM-18.

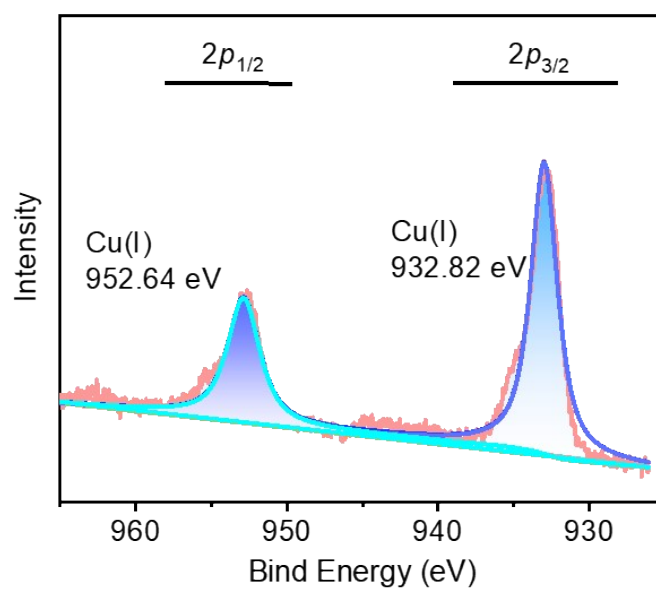

**Fig. S12** XPS of JNM-19.

## 7. Thermogravimetric analysis (TGA)

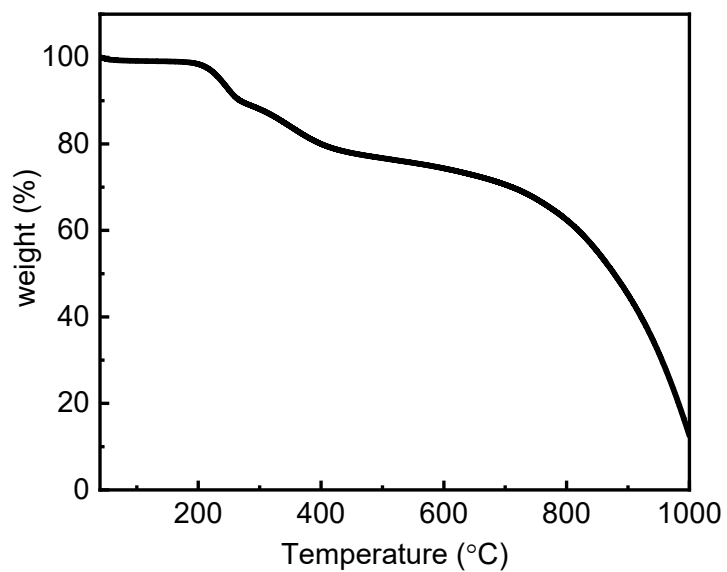

**Fig. S13** TGA of JNM-18 under N<sub>2</sub> atmosphere.

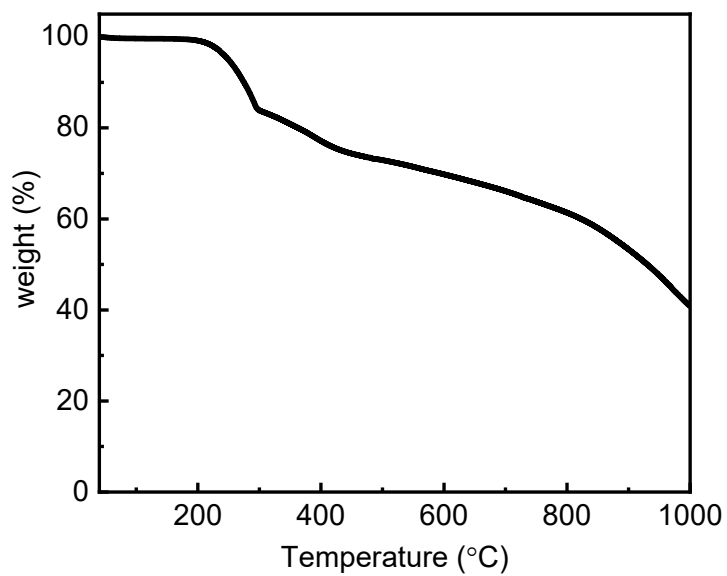

**Fig. S14** TGA of JNM-19 under N<sub>2</sub> atmosphere.

## 8. Variable-Temperature PXRD

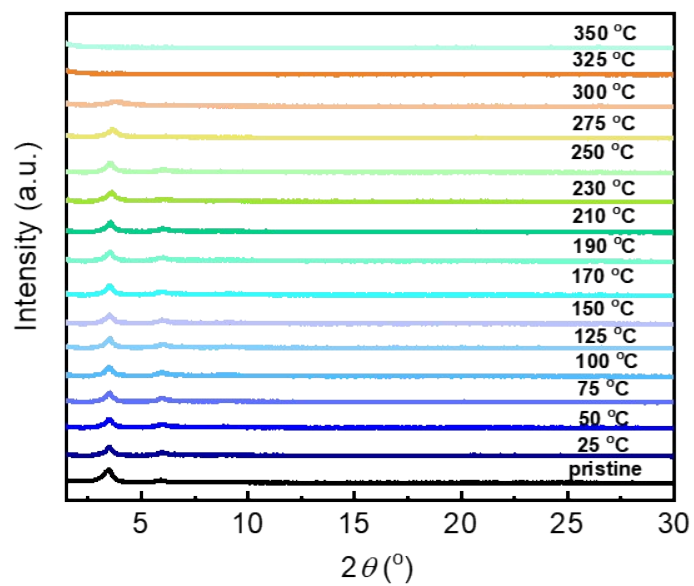

**Fig. S15** *In-situ* variable-temperature PXRD patterns of JNM-18.

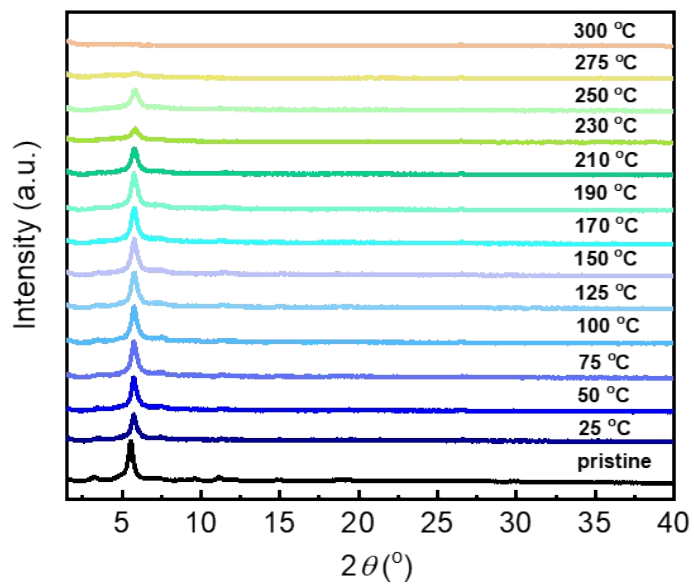

**Fig. S16** *In-situ* variable-temperature PXRD patterns of JNM-19.

## 9. Stability in various solvents

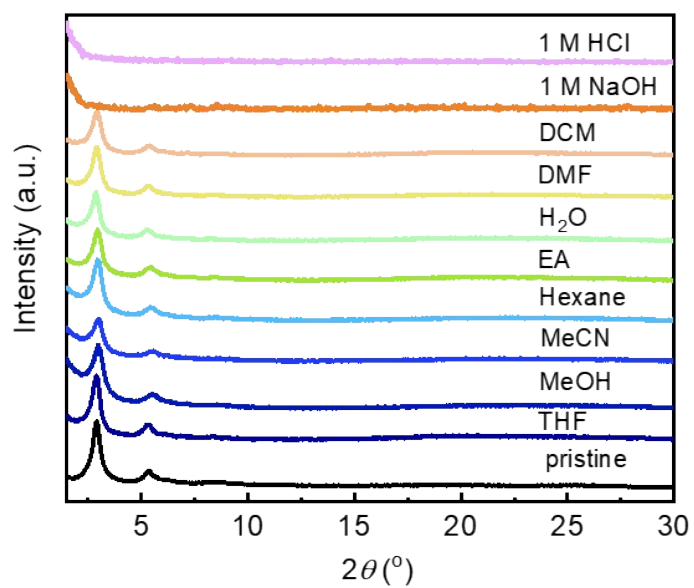

**Fig. S17** PXR D patterns for samples of **JNM-18** after treatment with different solvents for 24 h.

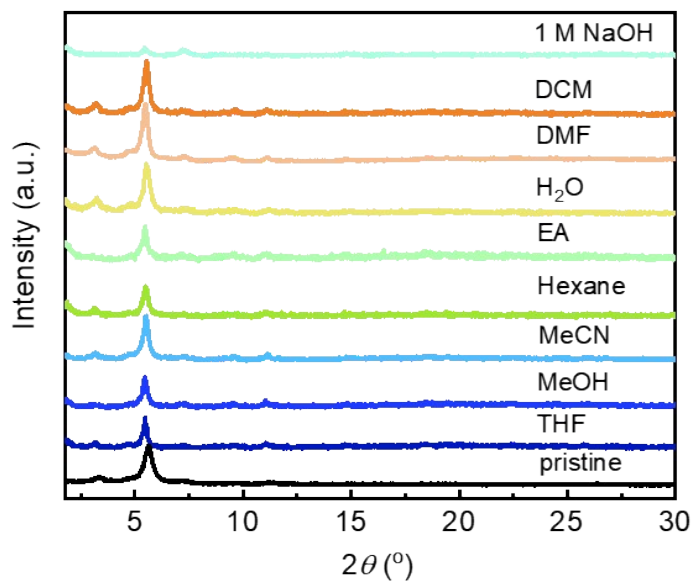

**Fig. S18** PXR D patterns for samples of **JNM-19** after treatment with different solvents for 24 h.

## 10. Structural Simulation

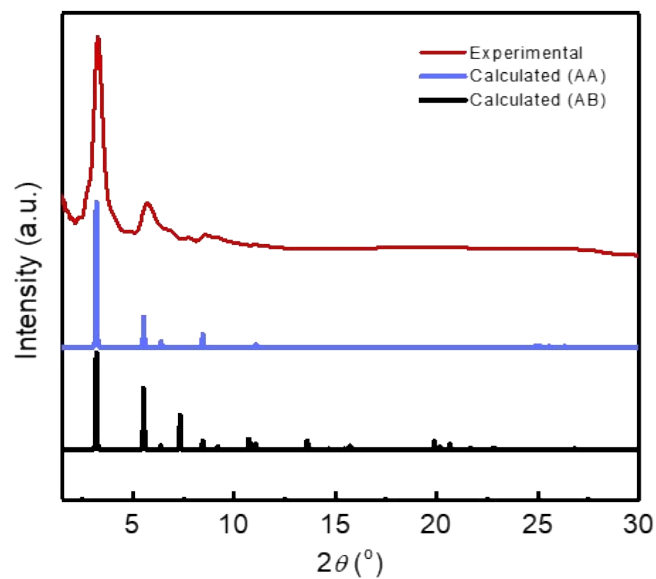

**Fig. S19** Comparison of experimental and calculated PXR D patterns for **JNM-18**.

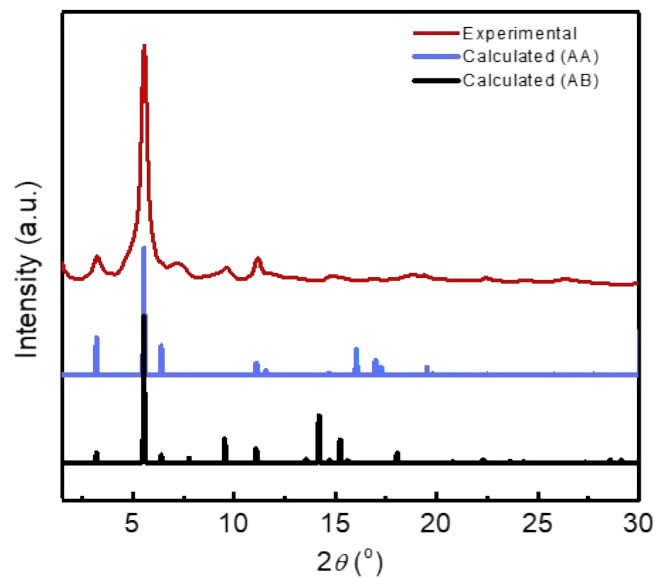

**Fig. S20** Comparison of experimental and calculated PXR D patterns for **JNM-19**.

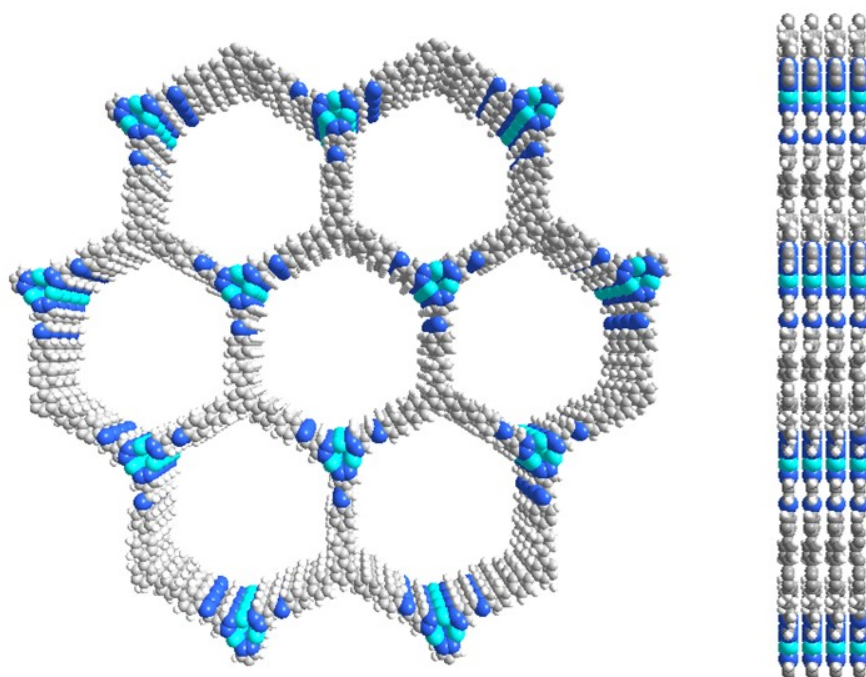

**Fig. S21** Top (left) and side (right) views of **JNM-18** in AA stacking model.

**Table S1.** Atomic coordinates of the AA-stacking mode of **JNM-18**.

| Space group: $P3$                                        |          |         |          |
|----------------------------------------------------------|----------|---------|----------|
| $a = b = 31.94 \text{ \AA}$ , and $c = 3.57 \text{ \AA}$ |          |         |          |
| $\alpha = \beta = 90^\circ$ , and $\gamma = 120$         |          |         |          |
|                                                          | X        | Y       | Z        |
| C1                                                       | 0.30799  | 0.69177 | 0.02339  |
| C2                                                       | 0.35885  | 0.71795 | 0.02329  |
| C3                                                       | 0.07154  | 0.5351  | 0.01828  |
| C4                                                       | 0.04588  | 0.48557 | -0.06844 |
| C5                                                       | -0.00461 | 0.46029 | -0.07091 |
| C6                                                       | -0.03052 | 0.48383 | 0.01017  |
| C7                                                       | -0.00497 | 0.53334 | 0.1017   |
| C8                                                       | 0.04555  | 0.55865 | 0.10432  |
| N9                                                       | 0.91758  | 0.45586 | 0.00474  |
| C10                                                      | 0.52729  | 0.41535 | 0.0053   |
| C11                                                      | 0.6107   | 0.4224  | 0.00256  |
| N12                                                      | 0.62644  | 0.39049 | 0.0012   |
| N13                                                      | 0.58905  | 0.34618 | 0.00089  |
| C14                                                      | 0.54796  | 0.34803 | 0.00189  |

|      |          |         |          |
|------|----------|---------|----------|
| C15  | 0.56056  | 0.3963  | 0.00297  |
| Cu16 | 0.59718  | 0.28974 | 0.001    |
| H17  | 0.06482  | 0.4665  | -0.14036 |
| H18  | -0.02371 | 0.42219 | -0.14032 |
| H19  | -0.02344 | 0.55261 | 0.17875  |
| H20  | 0.06429  | 0.59651 | 0.18106  |
| H21  | 0.63377  | 0.46127 | 0.0035   |
| H22  | 0.51192  | 0.31688 | 0.00238  |
| C23  | 0.38635  | 0.61415 | 1.02253  |
| C24  | 0.3656   | 0.56702 | 0.87346  |
| C25  | 0.39076  | 0.54171 | 0.87709  |
| C26  | 0.43793  | 0.56312 | 1.02015  |
| C27  | 0.45914  | 0.61021 | 1.16456  |
| C28  | 0.43356  | 0.63511 | 1.17052  |
| H29  | 0.4889   | 0.38993 | 0.00038  |
| H30  | 0.33044  | 0.54977 | 0.74171  |
| H31  | 0.37386  | 0.50589 | 0.75532  |
| H32  | 0.49502  | 0.62727 | 1.28538  |
| H33  | 0.45067  | 0.67022 | 1.30297  |
| H34  | 0.28844  | 0.71113 | 0.02333  |

---



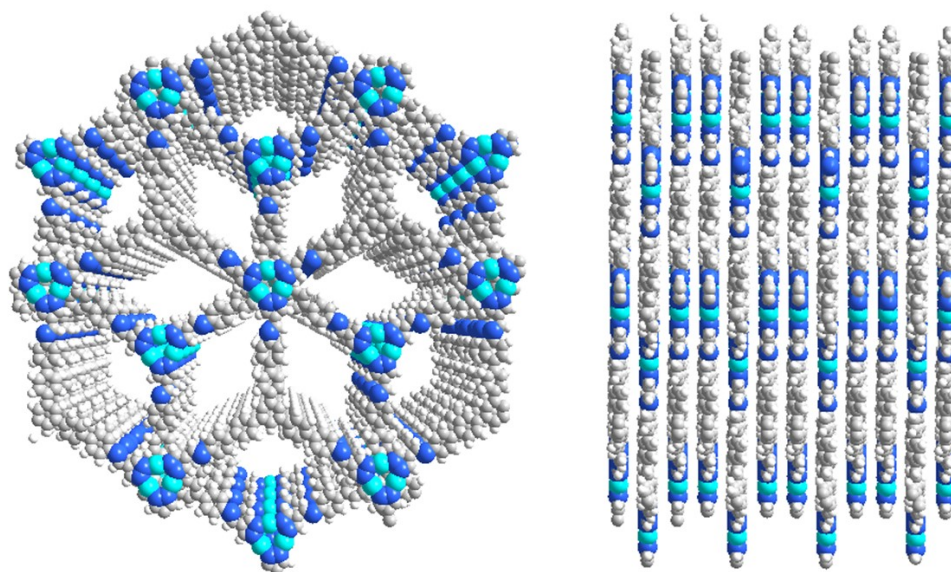

**Fig. S22** Top (left) and side (right) views of **JNM-18** in AB stacking model.

**Table S2.** Atomic coordinates of the AB-stacking mode of **JNM-18**.

| Space group: $P3$                                         |         |         |         |
|-----------------------------------------------------------|---------|---------|---------|
| $a = b = 31.94 \text{ \AA}$ , and $c = 13.38 \text{ \AA}$ |         |         |         |
| $\alpha = \beta = 90^\circ$ , and $\gamma = 120$          |         |         |         |
|                                                           | X       | Y       | Z       |
| C1                                                        | 0.30799 | 0.69177 | 0.16704 |
| C2                                                        | 0.35885 | 0.71795 | 0.16701 |
| C3                                                        | 0.07154 | 0.5351  | 0.16568 |
| C4                                                        | 0.04588 | 0.48557 | 0.14253 |
| C5                                                        | 0.99539 | 0.46029 | 0.14187 |
| C6                                                        | 0.96948 | 0.48383 | 0.16351 |
| C7                                                        | 0.99503 | 0.53334 | 0.18794 |
| C8                                                        | 0.04555 | 0.55865 | 0.18864 |
| N9                                                        | 0.91758 | 0.45586 | 0.16206 |
| C10                                                       | 0.52729 | 0.41535 | 0.16221 |
| C11                                                       | 0.6107  | 0.4224  | 0.16148 |
| N12                                                       | 0.62644 | 0.39049 | 0.16112 |
| N13                                                       | 0.58905 | 0.34618 | 0.16103 |
| C14                                                       | 0.54796 | 0.34803 | 0.1613  |
| C15                                                       | 0.56056 | 0.3963  | 0.16159 |
| Cu16                                                      | 0.59718 | 0.28974 | 0.16106 |
| C17                                                       | 0.38635 | 0.61415 | 0.16681 |
| C18                                                       | 0.3656  | 0.56702 | 0.12702 |
| C19                                                       | 0.39076 | 0.54171 | 0.12799 |
| C20                                                       | 0.43793 | 0.56312 | 0.16618 |
| C21                                                       | 0.45914 | 0.61021 | 0.20472 |

|      |         |         |         |
|------|---------|---------|---------|
| C22  | 0.43356 | 0.63511 | 0.20631 |
| C23  | 0.64132 | 0.35844 | 0.50037 |
| C24  | 0.69218 | 0.38462 | 0.50035 |
| C25  | 0.40487 | 0.20177 | 0.4918  |
| C26  | 0.37921 | 0.15224 | 0.47586 |
| C27  | 0.32872 | 0.12696 | 0.4752  |
| C28  | 0.30281 | 0.1505  | 0.49685 |
| C29  | 0.32836 | 0.20001 | 0.52128 |
| C30  | 0.37888 | 0.22532 | 0.52198 |
| N31  | 0.25091 | 0.12253 | 0.4954  |
| C32  | 0.86062 | 0.08202 | 0.49555 |
| C33  | 0.94403 | 0.08907 | 0.49481 |
| N34  | 0.95977 | 0.05716 | 0.49445 |
| N35  | 0.92238 | 0.01285 | 0.49437 |
| C36  | 0.88129 | 0.0147  | 0.49463 |
| C37  | 0.89389 | 0.06297 | 0.49492 |
| Cu38 | 0.93051 | 0.95641 | 0.4944  |
| C39  | 0.71968 | 0.28082 | 0.50014 |
| C40  | 0.69893 | 0.23369 | 0.46035 |
| C41  | 0.72409 | 0.20838 | 0.46132 |
| C42  | 0.77126 | 0.22979 | 0.49951 |
| C43  | 0.79247 | 0.27688 | 0.53805 |
| C44  | 0.76689 | 0.30178 | 0.53965 |
| C45  | 0.30799 | 0.69177 | 0.83371 |
| C46  | 0.35885 | 0.71795 | 0.83368 |
| C47  | 0.07154 | 0.5351  | 0.83234 |
| C48  | 0.04588 | 0.48557 | 0.8092  |
| C49  | 0.99539 | 0.46029 | 0.80854 |
| C50  | 0.96948 | 0.48383 | 0.83018 |
| C51  | 0.99503 | 0.53334 | 0.85461 |
| C52  | 0.04555 | 0.55865 | 0.85531 |
| N53  | 0.91758 | 0.45586 | 0.82873 |
| C54  | 0.52729 | 0.41535 | 0.82888 |
| C55  | 0.6107  | 0.4224  | 0.82815 |
| N56  | 0.62644 | 0.39049 | 0.82778 |
| N57  | 0.58905 | 0.34618 | 0.8277  |
| C58  | 0.54796 | 0.34803 | 0.82797 |
| C59  | 0.56056 | 0.3963  | 0.82826 |
| Cu60 | 0.59718 | 0.28974 | 0.82773 |
| C61  | 0.38635 | 0.61415 | 0.83348 |
| C62  | 0.3656  | 0.56702 | 0.79369 |
| C63  | 0.39076 | 0.54171 | 0.79466 |
| C64  | 0.43793 | 0.56312 | 0.83284 |
| C65  | 0.45914 | 0.61021 | 0.87139 |
| C66  | 0.43356 | 0.63511 | 0.87298 |
| H67  | 0.28678 | 0.71176 | 0.16709 |
| H68  | 0.06627 | 0.46573 | 0.12411 |
| H69  | 0.9753  | 0.42006 | 0.12344 |
| H70  | 0.9745  | 0.55295 | 0.20726 |
| H71  | 0.06567 | 0.59877 | 0.20808 |

|      |         |          |         |
|------|---------|----------|---------|
| H72  | 0.48658 | 0.38946  | 0.16282 |
| H73  | 0.63778 | 0.46284  | 0.16163 |
| H74  | 0.51151 | 0.31315  | 0.16126 |
| H75  | 0.32775 | 0.54906  | 0.09343 |
| H76  | 0.37299 | 0.50326  | 0.09756 |
| H77  | 0.49762 | 0.62851  | 0.23514 |
| H78  | 0.45136 | 0.6729   | 0.24016 |
| H79  | 0.62011 | 0.37843  | 0.5004  |
| H80  | 0.3996  | 0.13239  | 0.45744 |
| H81  | 0.3082  | 0.08671  | 0.45688 |
| H82  | 0.30784 | 0.21961  | 0.5406  |
| H83  | 0.399   | 0.26544  | 0.54142 |
| H84  | 0.81991 | 0.05613  | 0.49617 |
| H85  | 0.97112 | 0.12951  | 0.49496 |
| H86  | 0.84485 | -0.02018 | 0.49458 |
| H87  | 0.66108 | 0.21572  | 0.42676 |
| H88  | 0.70633 | 0.16992  | 0.43089 |
| H89  | 0.83095 | 0.29518  | 0.56846 |
| H90  | 0.78469 | 0.33957  | 0.57351 |
| H91  | 0.28678 | 0.71176  | 0.83376 |
| H92  | 0.06627 | 0.46572  | 0.79078 |
| H93  | 0.9753  | 0.42006  | 0.7181  |
| H94  | 0.9745  | 0.55295  | 0.87393 |
| H95  | 0.06567 | 0.59877  | 0.87475 |
| H96  | 0.48658 | 0.38946  | 0.82949 |
| H97  | 0.63778 | 0.46284  | 0.82831 |
| H98  | 0.51151 | 0.31315  | 0.82793 |
| H99  | 0.32775 | 0.54906  | 0.7601  |
| H100 | 0.37299 | 0.50326  | 0.76423 |
| H101 | 0.49762 | 0.62851  | 0.1881  |
| H102 | 0.45136 | 0.6729   | 0.90683 |

---

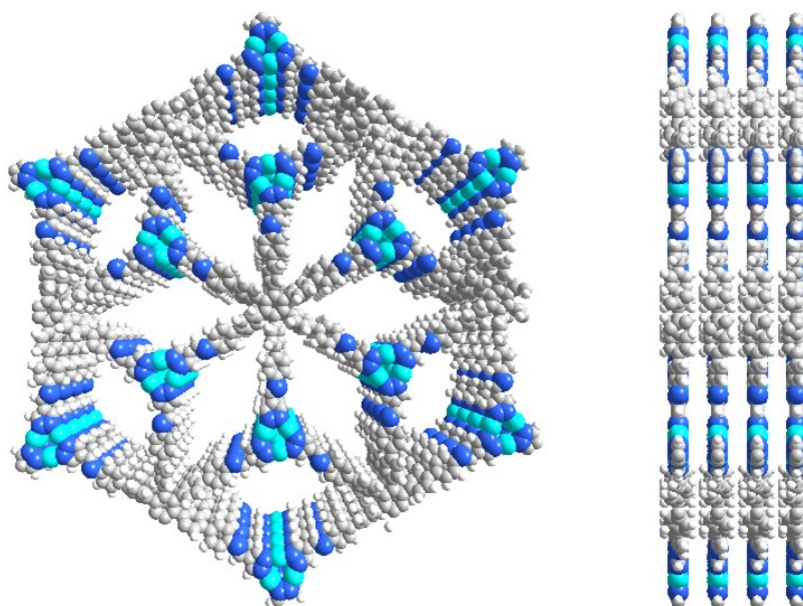

**Fig. S23** Top (left) and side (right) views of **JNM-19** in AA stacking model.

**Table S3.** Atomic coordinates of the AA-stacking mode of **JNM-19**.

| Space group: $P6$                                        |         |         |         |
|----------------------------------------------------------|---------|---------|---------|
| $a = b = 31.67 \text{ \AA}$ , and $c = 5.55 \text{ \AA}$ |         |         |         |
| $\alpha = \beta = 90^\circ$ , and $\gamma = 120$         |         |         |         |
|                                                          | X       | Y       | Z       |
| C1                                                       | 0.31793 | 0.53276 | 0.15471 |
| N2                                                       | 0.32001 | 0.57588 | 0.15302 |
| N3                                                       | 0.27571 | 0.56916 | 0.15222 |
| C4                                                       | 0.24358 | 0.52149 | 0.15296 |
| C5                                                       | 0.2695  | 0.49718 | 0.15456 |
| C6                                                       | 0.25018 | 0.44472 | 0.15698 |
| N7                                                       | 0.20376 | 0.41529 | 0.14669 |
| C8                                                       | 0.17984 | 0.36332 | 0.1504  |
| C9                                                       | 0.20247 | 0.33791 | 0.23526 |
| C10                                                      | 0.17736 | 0.28731 | 0.23746 |
| C11                                                      | 0.12918 | 0.2611  | 0.1565  |
| C12                                                      | 0.10656 | 0.28663 | 0.07467 |
| C13                                                      | 0.13166 | 0.33721 | 0.07303 |
| C14                                                      | 0.10256 | 0.20738 | 0.15826 |
| C15                                                      | 0.10762 | 0.18184 | 0.35279 |
| C16                                                      | 0.08222 | 0.13129 | 0.35461 |

|      |         |         |          |
|------|---------|---------|----------|
| C17  | 0.052   | 0.10526 | 0.16113  |
| C18  | 0.04725 | 0.13064 | -0.0338  |
| C19  | 0.07188 | 0.18117 | -0.03479 |
| C20  | 0.02535 | 0.05131 | 0.1623   |
| Cu21 | 0.62326 | 0.35958 | 0.15256  |
| H22  | 0.34903 | 0.5277  | 0.15606  |
| H23  | 0.20466 | 0.50584 | 0.15312  |
| H24  | 0.27546 | 0.43149 | 0.16156  |
| H25  | 0.23915 | 0.35666 | 0.30316  |
| H26  | 0.19584 | 0.26867 | 0.30053  |
| H27  | 0.06922 | 0.26751 | 0.01518  |
| H28  | 0.11354 | 0.35622 | 0.01034  |
| H29  | 0.13056 | 0.2009  | 0.50552  |
| H30  | 0.08592 | 0.11231 | 0.50686  |
| H31  | 0.02456 | 0.11114 | -0.18516 |
| H32  | 0.06757 | 0.19972 | -0.18856 |

---

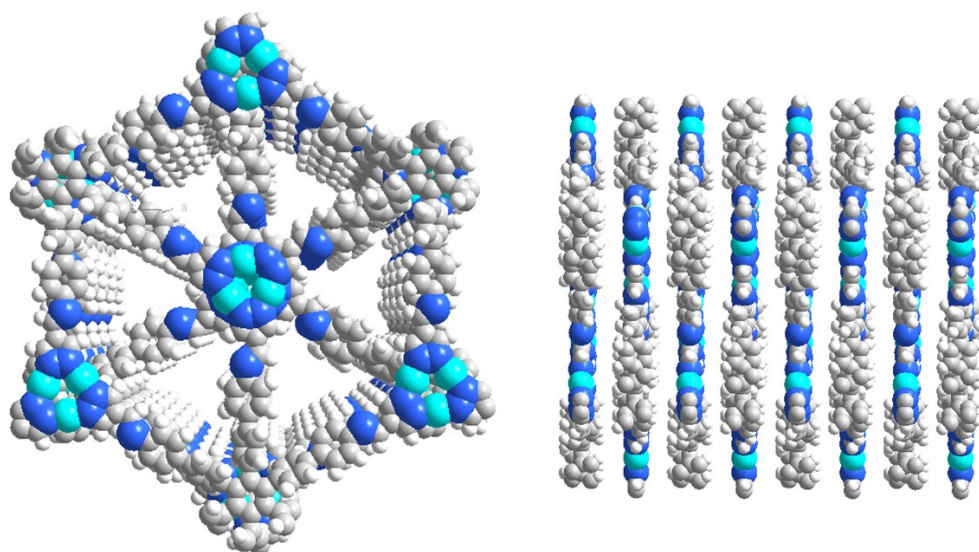

**Fig. S24** Top (left) and side (right) views of **JNM-19** in AA stacking model.

**Table S4.** Atomic coordinates of the AB-stacking mode of **JNM-19**.

| Space group: $P6_3$                                       |         |         |         |
|-----------------------------------------------------------|---------|---------|---------|
| $a = b = 31.67 \text{ \AA}$ , and $c = 12.52 \text{ \AA}$ |         |         |         |
| $\alpha = \beta = 90^\circ$ , and $\gamma = 120$          |         |         |         |
|                                                           | X       | Y       | Z       |
| Cu1                                                       | 0.59718 | 0.28974 | 0.16106 |
| Cu2                                                       | 0.93051 | 0.95641 | 0.4944  |
| Cu3                                                       | 0.59718 | 0.28974 | 0.82773 |
| C4                                                        | 0.30799 | 0.69177 | 0.16704 |
| C5                                                        | 0.52729 | 0.41535 | 0.16221 |
| C6                                                        | 0.6107  | 0.4224  | 0.16148 |
| C7                                                        | 0.54796 | 0.34803 | 0.1613  |
| C8                                                        | 0.56056 | 0.3963  | 0.16159 |
| C9                                                        | 0.38635 | 0.61415 | 0.16681 |
| C10                                                       | 0.3656  | 0.56702 | 0.12702 |
| C11                                                       | 0.39076 | 0.54171 | 0.12799 |
| C12                                                       | 0.35885 | 0.71795 | 0.16701 |
| C13                                                       | 0.43793 | 0.56312 | 0.16618 |
| C14                                                       | 0.45914 | 0.61021 | 0.20472 |
| C15                                                       | 0.43356 | 0.63511 | 0.20631 |
| C16                                                       | 0.64132 | 0.35844 | 0.50037 |
| C17                                                       | 0.69218 | 0.38462 | 0.50035 |
| C18                                                       | 0.40487 | 0.20177 | 0.4918  |
| C19                                                       | 0.37921 | 0.15224 | 0.47586 |
| C20                                                       | 0.32872 | 0.12696 | 0.4752  |
| C21                                                       | 0.30281 | 0.1505  | 0.49685 |
| C22                                                       | 0.32836 | 0.20001 | 0.52128 |

|     |         |         |         |
|-----|---------|---------|---------|
| C23 | 0.07154 | 0.5351  | 0.16568 |
| C24 | 0.37888 | 0.22532 | 0.52198 |
| C25 | 0.86062 | 0.08202 | 0.49555 |
| C26 | 0.94403 | 0.08907 | 0.49481 |
| C27 | 0.88129 | 0.0147  | 0.49463 |
| C28 | 0.89389 | 0.06297 | 0.49492 |
| C29 | 0.71968 | 0.28082 | 0.50014 |
| C30 | 0.04588 | 0.48557 | 0.14253 |
| C31 | 0.69893 | 0.23369 | 0.46035 |
| C32 | 0.72409 | 0.20838 | 0.46132 |
| C33 | 0.77126 | 0.22979 | 0.49951 |
| C34 | 0.79247 | 0.27688 | 0.53805 |
| C35 | 0.76689 | 0.30178 | 0.53965 |
| C36 | 0.30799 | 0.69177 | 0.83371 |
| C37 | 0.35885 | 0.71795 | 0.83368 |
| C38 | 0.07154 | 0.5351  | 0.83234 |
| C39 | 0.04588 | 0.48557 | 0.8092  |
| C40 | 0.99539 | 0.46029 | 0.80854 |
| C41 | 0.99539 | 0.46029 | 0.14187 |
| C42 | 0.96948 | 0.48383 | 0.83018 |
| C43 | 0.99503 | 0.53334 | 0.85461 |
| C44 | 0.04555 | 0.55865 | 0.85531 |
| C45 | 0.52729 | 0.41535 | 0.82888 |
| C46 | 0.6107  | 0.4224  | 0.82815 |
| C47 | 0.54796 | 0.34803 | 0.82797 |
| C48 | 0.56056 | 0.3963  | 0.82826 |
| C49 | 0.96948 | 0.48383 | 0.16351 |
| C50 | 0.38635 | 0.61415 | 0.83348 |
| C51 | 0.3656  | 0.56702 | 0.79369 |
| C52 | 0.39076 | 0.54171 | 0.79466 |
| C53 | 0.43793 | 0.56312 | 0.83284 |
| C54 | 0.45914 | 0.61021 | 0.87139 |
| C55 | 0.43356 | 0.63511 | 0.87298 |
| C56 | 0.99503 | 0.53334 | 0.18794 |
| C57 | 0.04555 | 0.55865 | 0.18864 |
| N58 | 0.62644 | 0.39049 | 0.16112 |
| N59 | 0.58905 | 0.34618 | 0.16103 |
| N60 | 0.25091 | 0.12253 | 0.4954  |
| N61 | 0.95977 | 0.05716 | 0.49445 |
| N62 | 0.92238 | 0.01285 | 0.49437 |
| N63 | 0.91758 | 0.45586 | 0.82873 |
| N64 | 0.62644 | 0.39049 | 0.82778 |
| N65 | 0.58905 | 0.34618 | 0.8277  |
| N66 | 0.91758 | 0.45586 | 0.16206 |
| H67 | 0.37299 | 0.50326 | 0.76423 |
| H68 | 0.49762 | 0.62851 | 0.1881  |
| H69 | 0.45136 | 0.6729  | 0.90683 |
| H70 | 0.28678 | 0.71176 | 0.16709 |
| H71 | 0.06627 | 0.46573 | 0.12411 |
| H72 | 0.9753  | 0.42006 | 0.12344 |

|      |         |          |         |
|------|---------|----------|---------|
| H73  | 0.9745  | 0.55295  | 0.20726 |
| H74  | 0.06567 | 0.59877  | 0.20808 |
| H75  | 0.48658 | 0.38946  | 0.16282 |
| H76  | 0.63778 | 0.46284  | 0.16163 |
| H77  | 0.51151 | 0.31315  | 0.16126 |
| H78  | 0.32775 | 0.54906  | 0.09343 |
| H79  | 0.37299 | 0.50326  | 0.09756 |
| H80  | 0.49762 | 0.62851  | 0.23514 |
| H81  | 0.45136 | 0.6729   | 0.24016 |
| H82  | 0.62011 | 0.37843  | 0.5004  |
| H83  | 0.3996  | 0.13239  | 0.45744 |
| H84  | 0.3082  | 0.08671  | 0.45688 |
| H85  | 0.30784 | 0.21961  | 0.5406  |
| H86  | 0.399   | 0.26544  | 0.54142 |
| H87  | 0.81991 | 0.05613  | 0.49617 |
| H88  | 0.97112 | 0.12951  | 0.49496 |
| H89  | 0.84485 | -0.02018 | 0.49458 |
| H90  | 0.66108 | 0.21572  | 0.42676 |
| H91  | 0.70633 | 0.16992  | 0.43089 |
| H92  | 0.83095 | 0.29518  | 0.56846 |
| H93  | 0.78469 | 0.33957  | 0.57351 |
| H94  | 0.28678 | 0.71176  | 0.83376 |
| H95  | 0.06627 | 0.46572  | 0.79078 |
| H96  | 0.9753  | 0.42006  | 0.7181  |
| H97  | 0.9745  | 0.55295  | 0.87393 |
| H98  | 0.06567 | 0.59877  | 0.87475 |
| H99  | 0.48658 | 0.38946  | 0.82949 |
| H100 | 0.63778 | 0.46284  | 0.82831 |
| H101 | 0.51151 | 0.31315  | 0.82793 |
| H102 | 0.32775 | 0.54906  | 0.7601  |

---



## 11. Photos for obtained samples

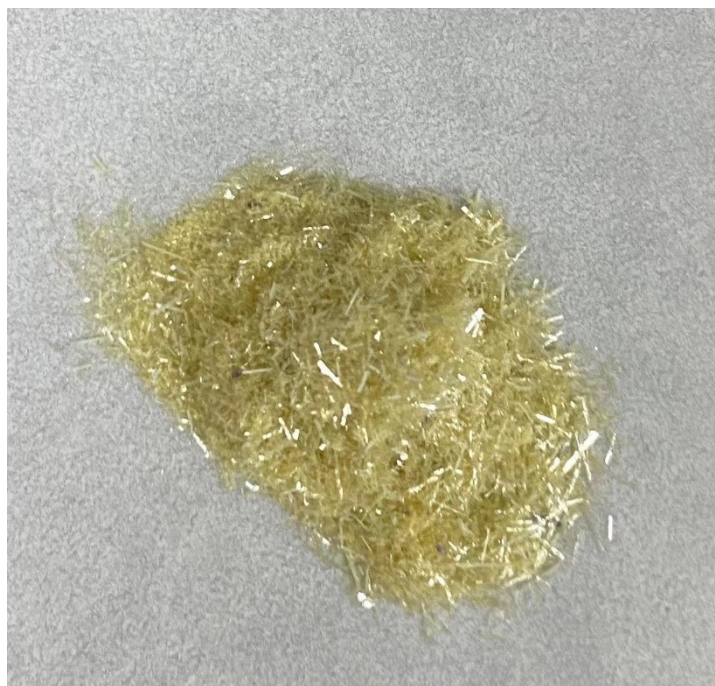

**Fig. S25** Photo of  $\text{Cu}_3\text{L}_3$ .

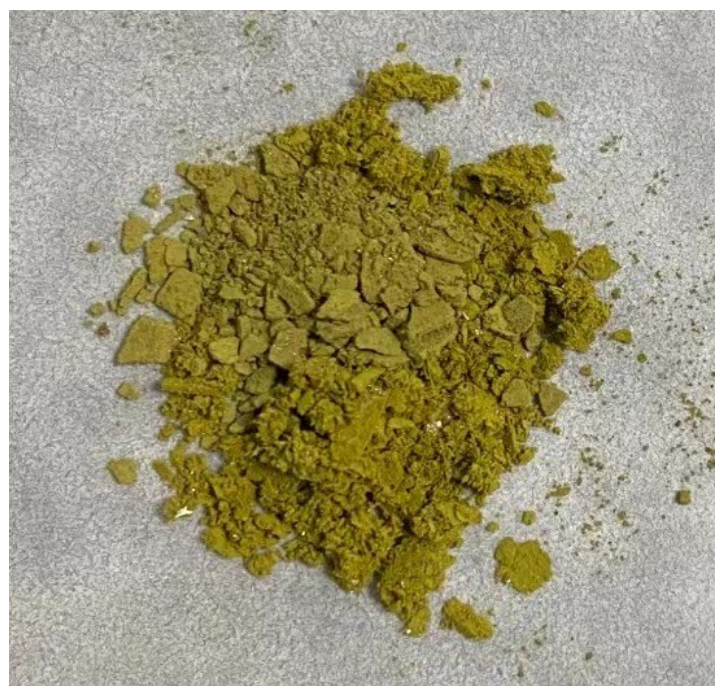

**Fig. S26** Photo of JNM-18.

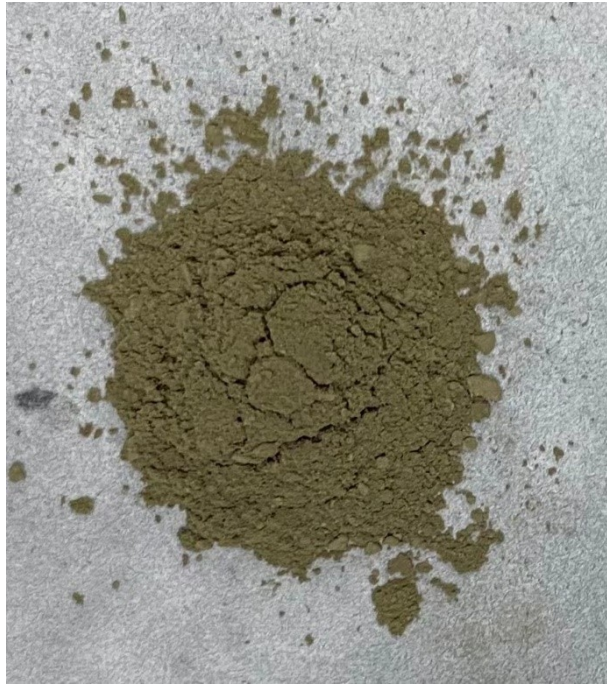

**Fig. S27** Photo of JNM-19.

## 12. Mott–Schottky plot

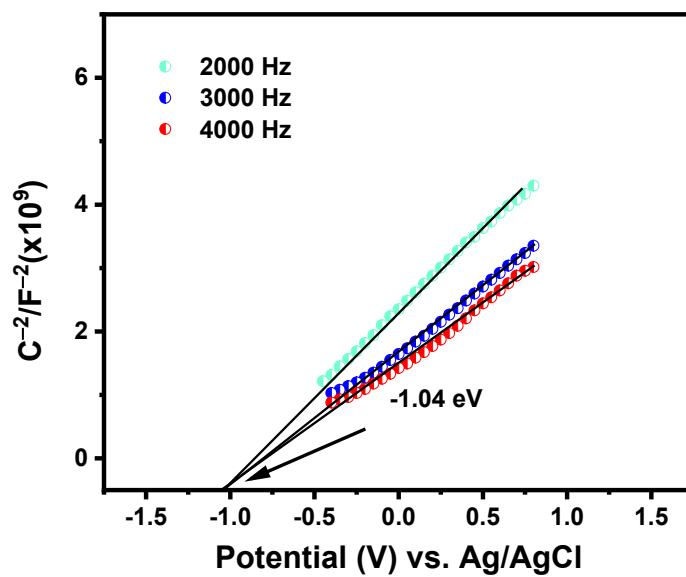

Fig. S28 Mott–Schottky of JNM-18.

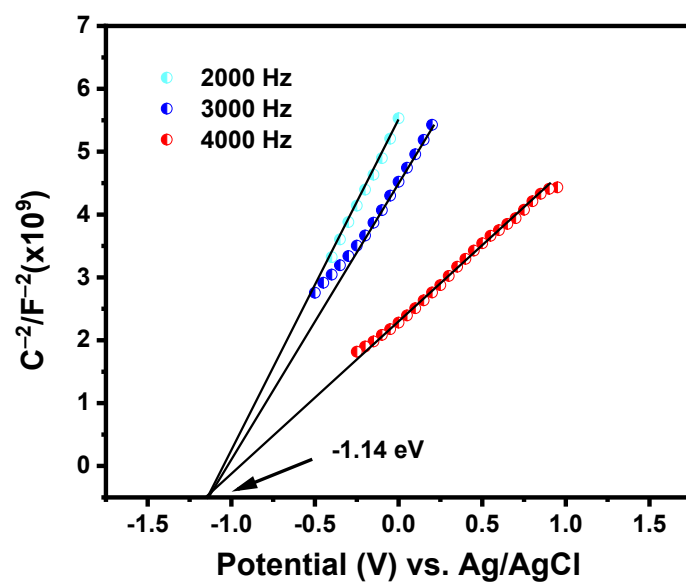

Fig. S29 Mott–Schottky of JNM-19.

### 13. Photocurrent response

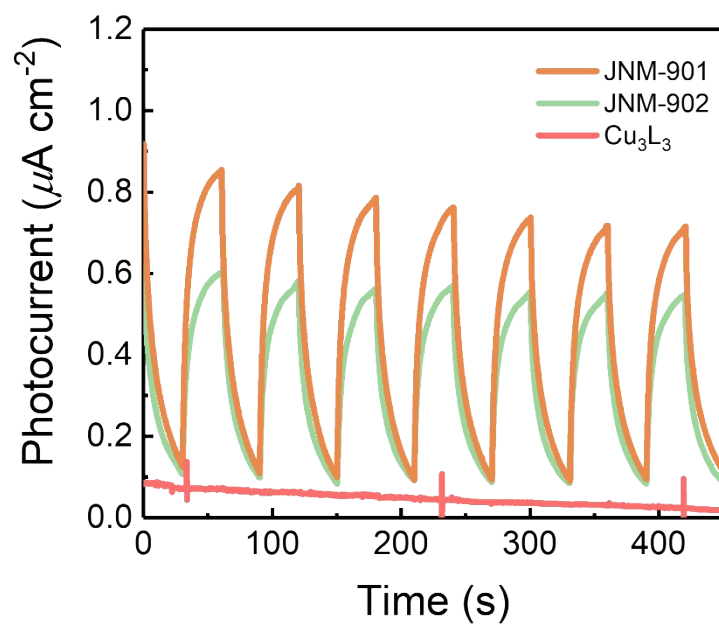

**Fig. S30** Comparison of photocurrent responses of  $\text{Cu}_3\text{L}_3$ , JNM-18 and JNM-19.

## 14. EPR experiment

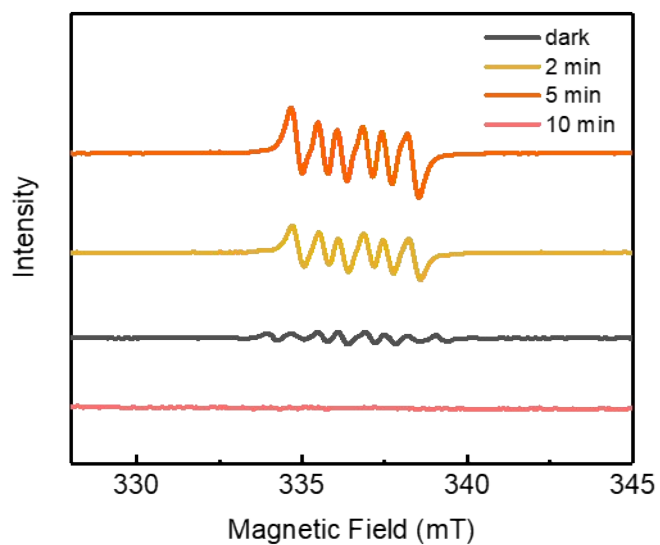

**Fig. S31** EPR of **JNM-19** under the dark and visible light illumination in the presence of DMPO.

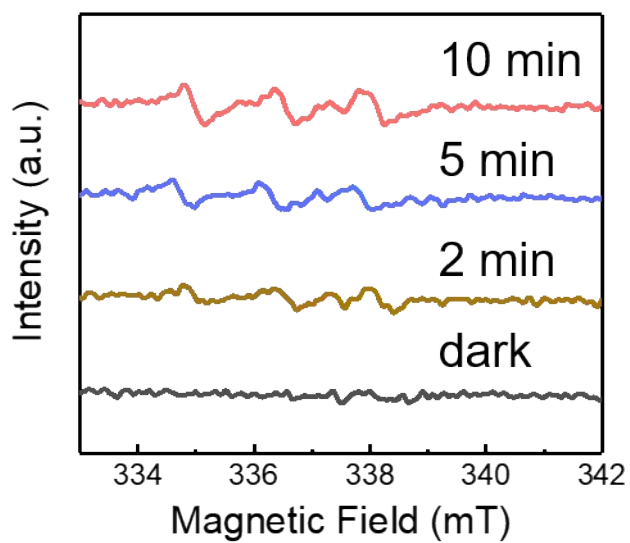

**Fig. S32** EPR of **JNM-18** under the dark and visible light illumination in the presence of TEMP.

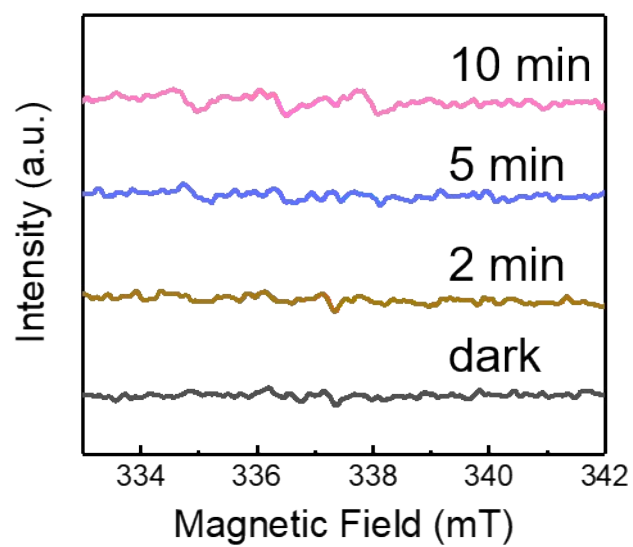

**Fig. S33** EPR of **JNM-19** under the dark and visible light illumination in the presence of TEMP.

## 15. Evaluation of the $O_2^{\cdot-}$ generation efficiency

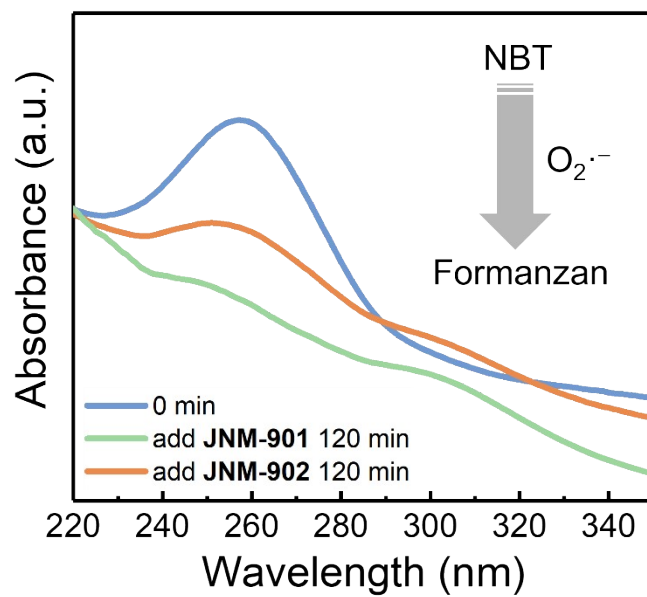

**Fig. S34** UV–vis absorption spectra of NBT with the addition of **JNM-18** and **JNM-19** upon visible light irradiation.

## 16. Photocatalytic Application

### 16.1 General procedure

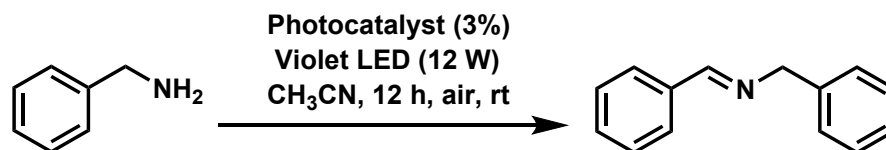

A solution of benzylamine (0.3 mmol) and photocatalyst (3% based on Cu,) in CH<sub>3</sub>CN (2 mL) was stirred under 12 W violet LED (395 nm) for 12 h at room temperature. The yields were determined by <sup>1</sup>H NMR spectrum by calculating the integration of singlet peak of methylene proton in the products (at about 4.84 ppm for -CH=N-CH<sub>2</sub>-) and that of the corresponding proton in the starting materials (at about 3.90 ppm as singlet for H<sub>2</sub>N-CH<sub>2</sub>-). Controlled experiments were investigated in a similar procedure. No Au ion was found in the supernatant suggested by ICP measurement.

### 16.2 Recyclability

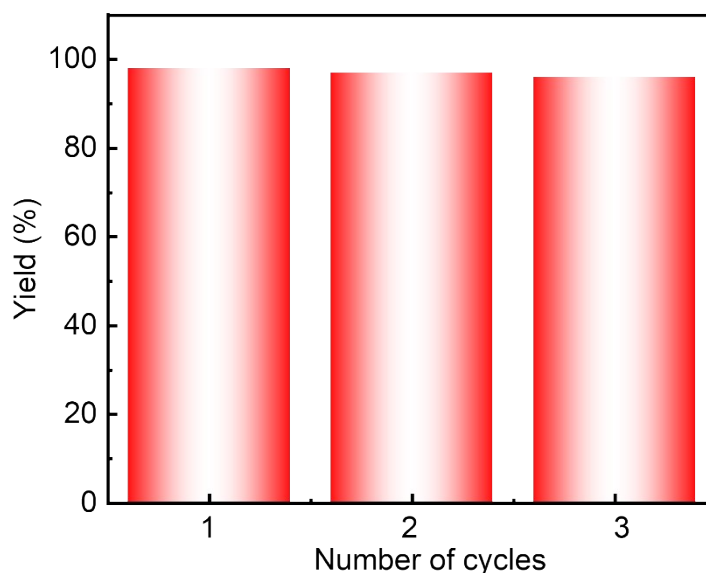

**Fig. S35** Recyclability of JNM-18 as the photocatalyst for benzylamine oxidations.



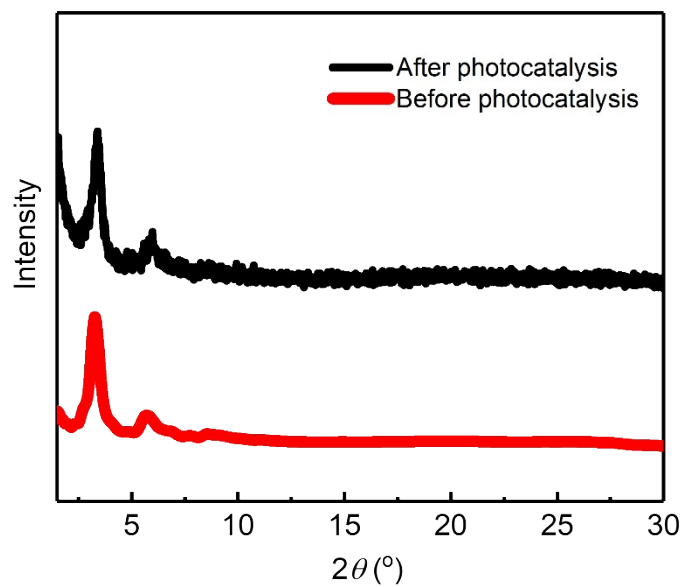

**Fig. S36** Comparison of PXRD patterns of the As-synthesized **JNM-18** catalysts and that after photocatalyzed reaction of benzylamine oxidations.

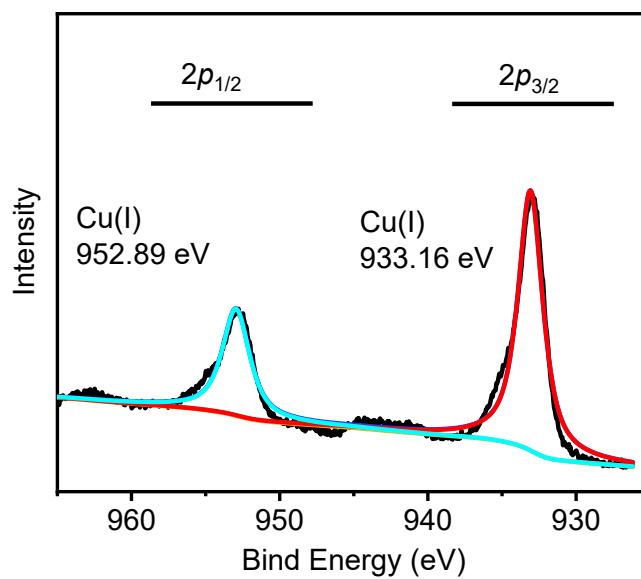

**Fig. S37** XPS for **JNM-18** after photocatalyzed reaction of benzylamine oxidations.

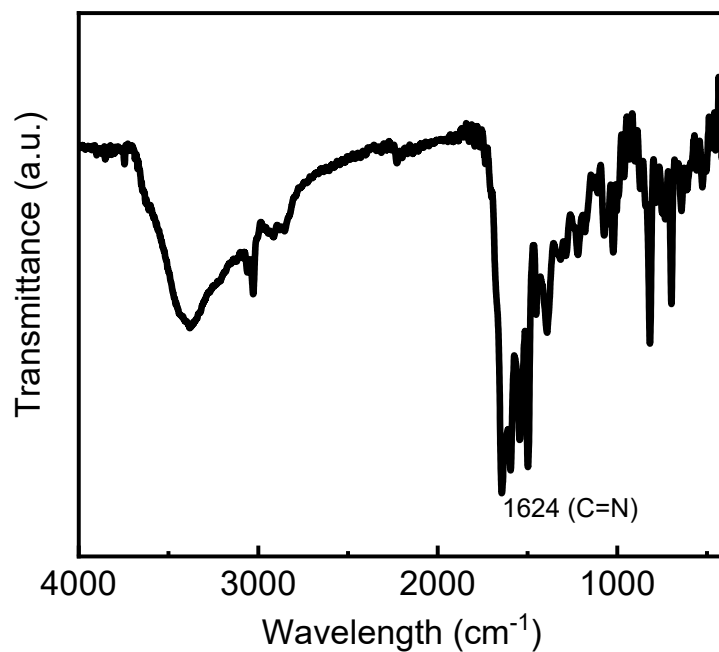

**Fig. S38** FT-IR spectra of **JNM-18** after photocatalyzed reaction of benzylamine oxidations.

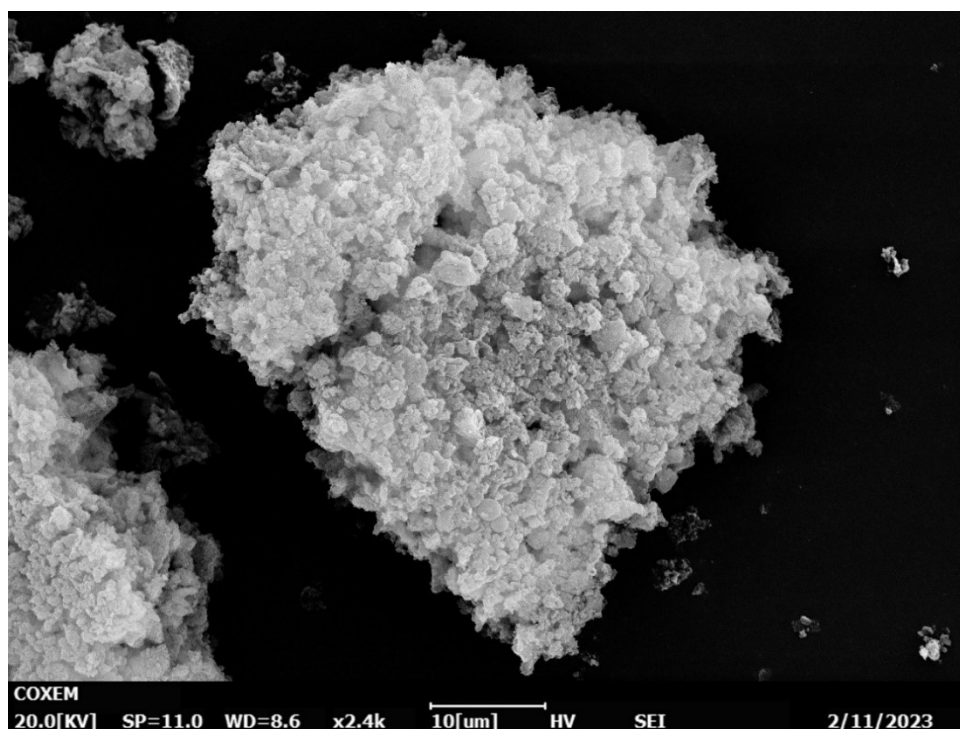

**Fig. S39** SEM of **JNM-18** after photocatalyzed reaction of benzylamine oxidations.

### 16.3 Aerobic oxidation of secondary amines

**Table S5.** Photocatalyzed aerobic oxidation of secondary amines to imines by **JNM-18**.<sup>a</sup>

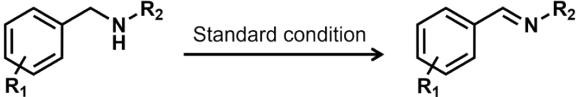

| Entry | Substrate                                                                               | Product                                                                                  | Yield (%) |
|-------|-----------------------------------------------------------------------------------------|------------------------------------------------------------------------------------------|-----------|
| 1     |  (5a)  |  (6a)  | 75        |
| 2     |  (5b)  |  (6b)  | 40        |
| 3     |  (5c)  |  (6c)  | 78        |
| 4     |  (5d)  |  (4a)  | 47        |
| 5     |  (5e) |  (4g) | 62        |

<sup>a</sup>Reaction condition: amine (0.3 mmol), **JNM-18** (3 mol %), CH<sub>3</sub>CN (2 mL), rt, violet LED (12 W), air. The reported yields presented are based on <sup>1</sup>H NMR spectra.

## 16.4 Mechanism

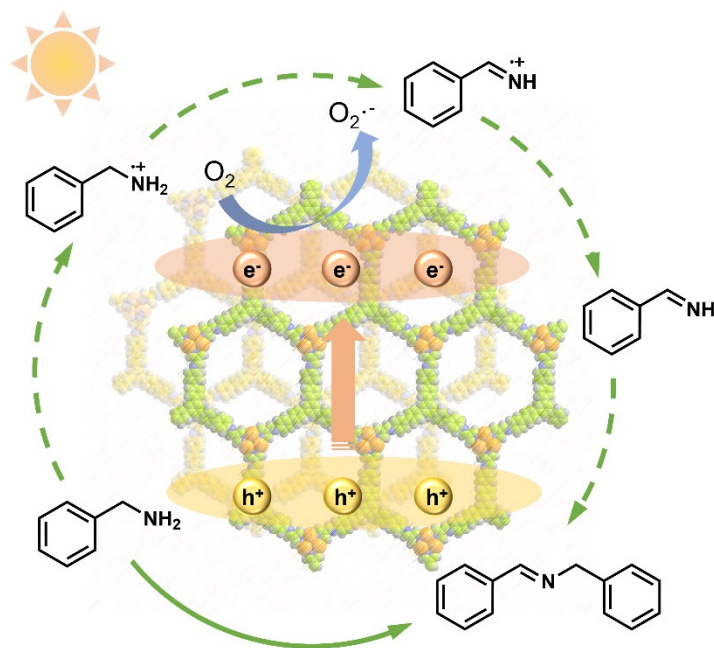

**Fig. S40** Proposed reaction mechanism of the photocatalyzed aerobic oxidation of benzylamine by JNM-18.

## 16.4 Scope of JNM-18 Catalyst for oxidations of amines.

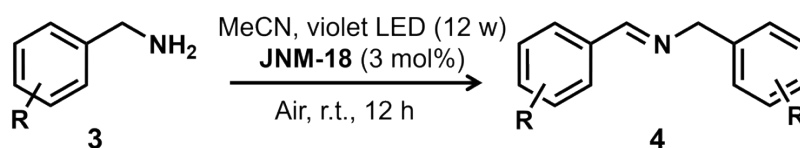

A solution of amine (1.0 equiv, 0.3 mmol) and **JNM-18** (3% based on Cu,) in CH<sub>3</sub>CN (2 mL) was stirred under 12 W violet LED for 12 h at room temperature. The yields were determined by <sup>1</sup>H NMR spectrum by calculating the integration of singlet peak of methylene proton in the products (at about 4.84 ppm for -CH=N-CH<sub>2</sub>-) and that of the corresponding proton in the starting materials (at about 3.90 ppm as singlet for H<sub>2</sub>N-CH<sub>2</sub>-).

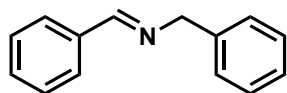

**4a.** <sup>1</sup>H NMR (400 MHz, 298 K, CDCl<sub>3</sub>) δ 8.44 (s, 1H), 7.82 (s, 2H), 7.43 (d, *J* = 32.4 Hz, 8H), 4.87 (s, 2H).

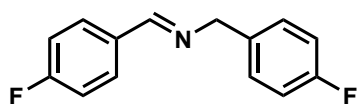

**4b.** <sup>1</sup>H NMR (400 MHz, 298 K, CDCl<sub>3</sub>) δ 8.35 (s, 1H), 7.77 (dd, *J* = 8.6, 5.7 Hz, 2H), 7.30 (dd, *J* = 8.5, 5.5 Hz, 2H), 7.10 (t, *J* = 8.6 Hz, 2H), 7.04 (t, *J* = 8.7 Hz, 2H), 4.76 (s, 2H).

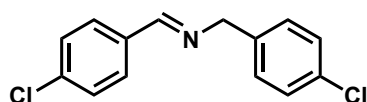

**4c.** <sup>1</sup>H NMR (400 MHz, 298 K, CDCl<sub>3</sub>) δ 8.40 (s, 1H), 7.41 (d, *J* = 8.3 Hz, 2H), 7.35 (s, 2H), 7.26 (t, *J* = 6.1 Hz, 4H), 4.79 (s, 2H).

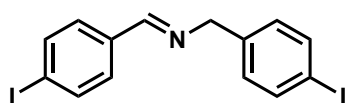

**4d.** <sup>1</sup>H NMR (400 MHz, 298 K, CDCl<sub>3</sub>) δ 8.32 (d, *J* = 1.5 Hz, 1H), 7.79 (s, 2H), 7.69

(d,  $J = 8.3$  Hz, 2H), 7.51 (d,  $J = 8.4$  Hz, 2H), 7.10 (d,  $J = 8.3$  Hz, 2H), 4.75 (s, 2H).

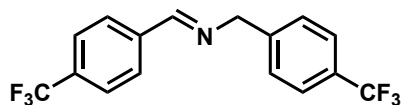

**4e.**  $^1\text{H NMR}$  (400 MHz, 298 K,  $\text{CDCl}_3$ )  $\delta$  8.47 (s, 1H), 7.91 (d,  $J = 8.0$  Hz, 2H), 7.69 (d,  $J = 8.0$  Hz, 2H), 7.62 (d,  $J = 8.0$  Hz, 2H), 7.48 (d,  $J = 8.0$  Hz, 2H), 4.90 (s, 2H).

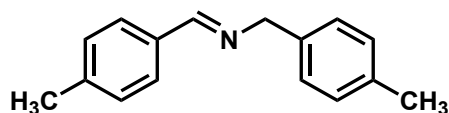

**4f.**  $^1\text{H NMR}$  (400 MHz, 298 K,  $\text{CDCl}_3$ )  $\delta$  8.38 (s, 1H), 7.71 (d,  $J = 8.0$  Hz, 2H), 7.20 (d,  $J = 5.5$  Hz, 6H), 4.80 (s, 2H), 2.41 (s, 3H), 2.38 (s, 3H).

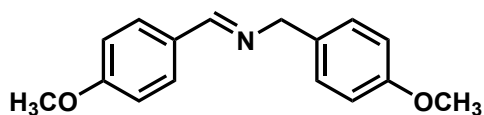

**4g.**  $^1\text{H NMR}$  (400 MHz, 298 K,  $\text{CDCl}_3$ )  $\delta$  8.40 (s, 1H), 7.74 (d,  $J = 8.7$  Hz, 2H), 7.27 (d,  $J = 8.5$  Hz, 2H), 6.95 (d,  $J = 6.7$  Hz, 2H), 6.90 (s, 2H), 4.75 (s, 2H), 3.85 (s, 3H), 3.82 (s, 3H).

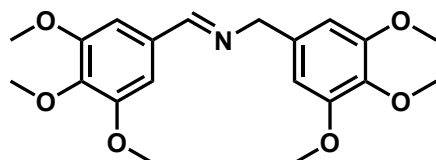

**4h.**  $^1\text{H NMR}$  (400 MHz, 298 K,  $\text{CDCl}_3$ )  $\delta$  8.23 (s, 1H), 6.99 (s, 2H), 6.49 (s, 2H), 4.68 (s, 2H), 3.85 – 3.77 (m, 18H).

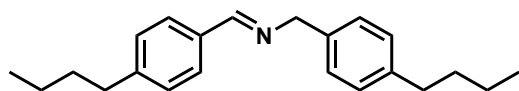

**4i.**  $^1\text{H NMR}$  (400 MHz, 298 K,  $\text{CDCl}_3$ )  $\delta$  8.39 (s, 1H), 7.74 (d,  $J = 7.9$  Hz, 2H), 7.28 (d,  $J = 4.0$  Hz, 4H), 7.21 (s, 2H), 4.82 (s, 2H), 2.69 – 2.64 (m, 4H), 1.66 – 1.61 (m, 4H), 1.43 – 1.37 (m, 4H), 0.98 (dd,  $J = 7.3, 2.9$  Hz, 6H).

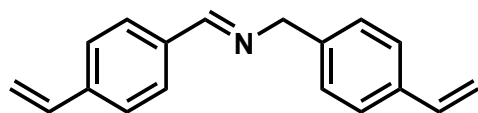

**4j.**  $^1\text{H NMR}$  (400 MHz, 298 K,  $\text{CDCl}_3$ )  $\delta$  8.32 (s, 1H), 7.77 (d,  $J = 8.0$  Hz, 2H), 7.54 – 7.31 (m, 6H), 6.89 – 6.64 (m, 2H), 5.81 (dd,  $J = 34.5, 17.6$  Hz, 2H), 5.30 (dd,  $J = 38.4, 10.8$  Hz, 2H), 4.84 (d,  $J = 7.5$  Hz, 2H).

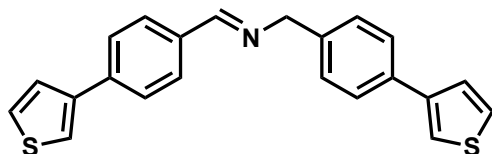

**4k.**  $^1\text{H NMR}$  (400 MHz, 298 K,  $\text{CDCl}_3$ )  $\delta$  8.43 (s, 1H), 7.52 – 7.18 (m, 6H), 7.16 – 6.88 (m, 8H), 4.96 (s, 2H).

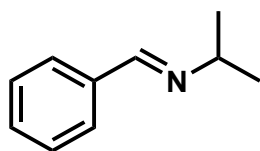

**6a.**  $^1\text{H NMR}$  (400 MHz, 298 K,  $\text{CDCl}_3$ )  $\delta$  8.25 (s, 1H), 7.71 – 7.65 (m, 2H), 7.43 – 7.36 (m, 2H), 7.38 – 7.31 (m, 1H), 3.61 (dq,  $J = 15.0, 7.5$  Hz, 1H), 1.21 (d,  $J = 7.5$  Hz, 6H).

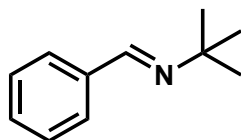

**6b.**  $^1\text{H NMR}$  (400 MHz, 298 K,  $\text{CDCl}_3$ )  $\delta$  8.11 (s, 1H), 7.73 – 7.67 (m, 2H), 7.43 – 7.36 (m, 2H), 7.39 – 7.31 (m, 1H), 1.26 (s, 7H).

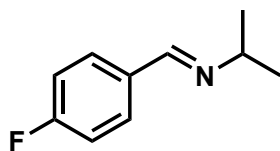

**6c.**  $^1\text{H NMR}$  (400 MHz, 298 K,  $\text{CDCl}_3$ )  $\delta$  8.26 (s, 1H), 7.69 – 7.63 (m, 2H), 7.14 – 7.07 (m, 2H), 3.62 (p,  $J = 7.5$  Hz, 1H), 1.21 (d,  $J = 7.5$  Hz, 6H).

## 17. Computational Details

Density functional theory (DFT) was performed for **JNM-18** and **JNM-19** by using Gaussian 09 software.<sup>1</sup> The following level of theory was adopted in all the calculations: (1) Functional: the hybrid B3LYP in conjunction with D3(BJ) dispersion correlation;<sup>2, 3</sup> (2) Basis sets: the LANL2DZ<sup>4-7</sup> effective core potential (ECP) was used for Cu and the 6-31G(d,p)<sup>8</sup> basis set was used for the other atoms. Firstly, the geometrical optimization was performed for the monomers of all the above compounds to obtain their stable ground-state ( $S_0$ ) geometries by restricted B3LYP method, confirmed by the absent of imaginary frequencies (NIMG = 0). The Electrostatic potential (ESP) surface maps were obtained in Gaussian view based on the optimized structures.



## 18. Reference

- 1 M. J. Frisch, G. W. Trucks, H. B. Schlegel, G. E. Scuseria, M. A. Robb, J. R. Cheeseman, G. Scalmani, V. Barone, B. Mennucci, G. A. Petersson, H. Nakatsuji, M. Caricato, X. Li, H. P. Hratchian, A. F. Izmaylov, J. Bloino, G. Zheng, J. L. Sonnenberg, M. Hada, M. Ehara, K. Toyota, R. Fukuda, J. Hasegawa, M. Ishida, T. Nakajima, Y. Honda, O. Kitao, H. Nakai, T. Vreven, Jr. J. A. Montgomery, J. E. Peralta, F. Ogliaro, M. Bearpark, J. J. Heyd, E. Brothers, K. N. Kudin, V. N. Staroverov, R. Kobayashi, J. Normand, K. Raghavachari, A. Rendell, J. C. Burant, S. S. Iyengar, J. Tomasi, M. Cossi, N. Rega, J. M. Millam, M. Klene, J. E. Knox, J.B. Cross, V. Bakken, C. Adamo, J. Jaramillo, R. Gomperts, R. E. Stratmann, O. Yazyev, A. J. Austin, R. Cammi, C. Pomelli, J. Ochterski, R. L. Martin, K. Morokuma, V. G. Zakrzewski, G. A. Voth, P. Salvador, J. J. Dannenberg, S. Dapprich, A. D. Daniels, O. Farkas, J. B. Foresman, J. V. Ortiz, J. Cioslowski and D. J. Fox, Gaussian 09 (Revision E.01), Gaussian, Inc., Wallingford, CT, 2013.
- 2 S. Grimme, J. Antony, S. Ehrlich and H. Krieg, A consistent and accurate ab initio parametrization of density functional dispersion correction (DFT-D) for the 94 elements H-Pu, *J. Chem. Phys.*, 2010, **132**, 154104.
- 3 S. Grimme, S. Ehrlich and L. Goerigk, Effect of the damping function in dispersion corrected density functional theory, *J. Comput. Chem.*, 2011, **32**, 1456–1465.
- 4 T. H. Dunning, Jr., and P. J. Hay, In *Modern Theoretical Chemistry*; Schaefer, H. F., III., Ed.; Plenum: New York, 1976, Vol. 3, pp 1–28.
- 5 P. J. Hay and W. R. Wadt, *Ab initio* effective core potentials for molecular calculations. Potentials for the transition metal atoms Sc to Hg, *J. Chem. Phys.*, 1985, **82**, 270.
- 6 W. R. Wadt and P. J. Hay, *Ab initio* effective core potentials for molecular calculations. Potentials for main group elements Na to Bi, *J. Chem. Phys.*, 1985, **82**, 284.
- 7 P. J. Hay and W. R. Wadt, *Ab initio* effective core potentials for molecular calculations. Potentials for K to Au including the outermost core orbitals, *J. Chem.*

*Phys.*, 1985, **82**, 299.

- 8 P. C. Hariharan, and J. A. Pople, A. Accuracy of AH n equilibrium Geometries by Single Determinant Molecular Orbital Theory, *Mol. Phys.*, 1974, **27**, 209.
